# Supplementary material for: CD7-directed CAR T-cell therapy: a potential immunotherapy strategy for relapsed/refractory acute myeloid leukemia
Source: PubMed Central journal article supplement (PMC9523980; doi:10.1186/s40164-022-00318-6), 2022-09-29
Supplement: 40164_2022_318_MOESM1_ESM.pdf [file 40164_2022_318_MOESM1_ESM.pdf]

# Additional file 1

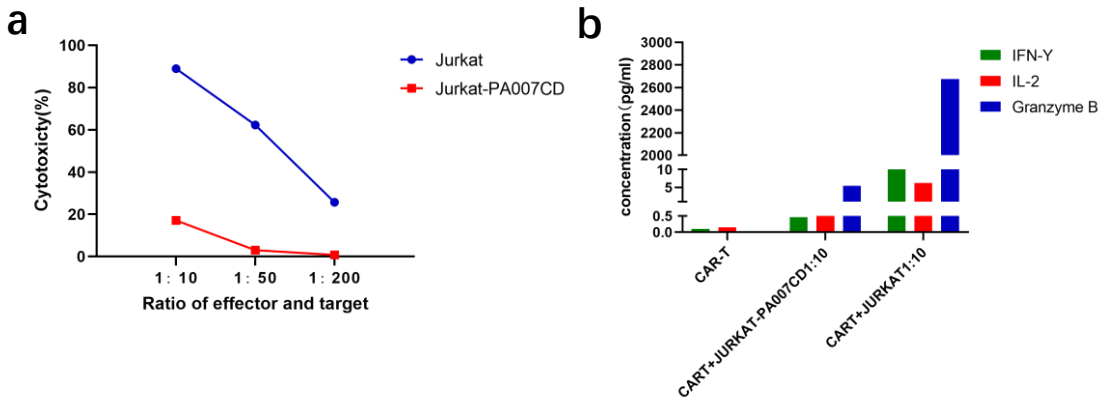

**Figure S1.** Cytotoxicity and cytokines analysis of CD7 CAR T-cells. **a.** Cytotoxicity analysis of CD7 CAR T-cells at different effector and target ratios; **b.** Concentrations of cytokines secreted by CAR T-cells.

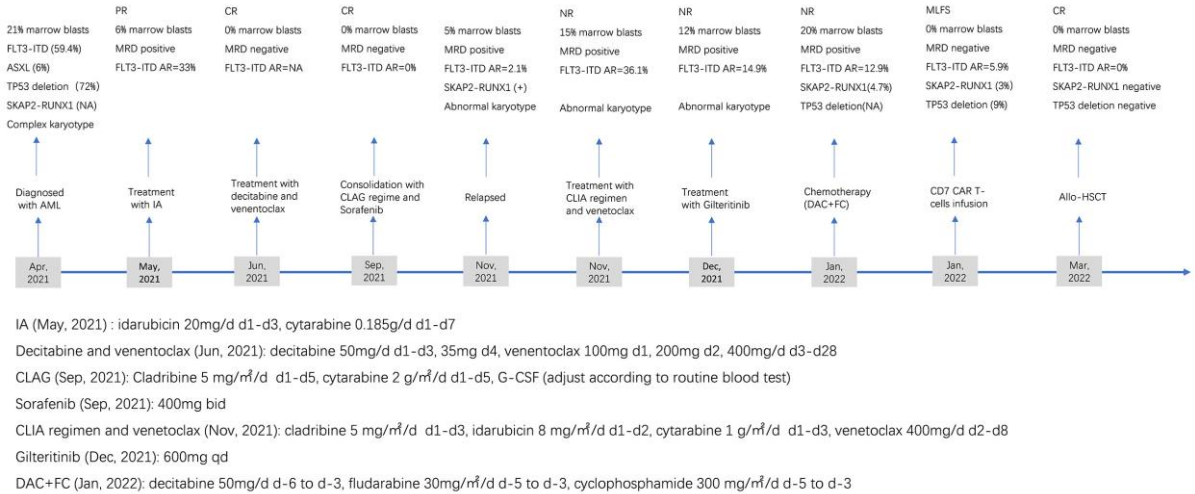

**Figure S2.** Diagrammatic sketch of the treatments and response.

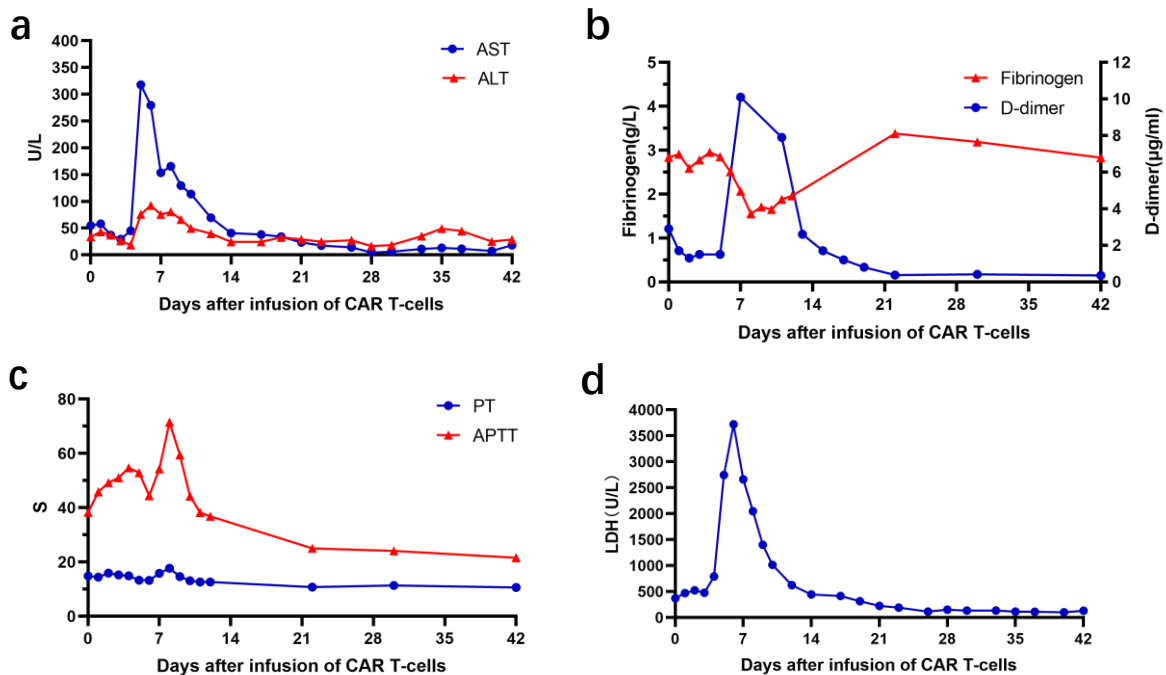

**Figure S3.** Infusion-related hepatic toxicities. **a.** Change of the alanine aminotransferase (ALT) and the aspartate aminotransferase (AST) after the infusion; **b.** Change of the fibrinogen and the D-dimer after the infusion; **c.** Change of the prothrombin time (PT) and the activated partial thromboplastin time (APTT) after the infusion; **d.** Change of the lactate dehydrogenase (LDH) after the infusion.

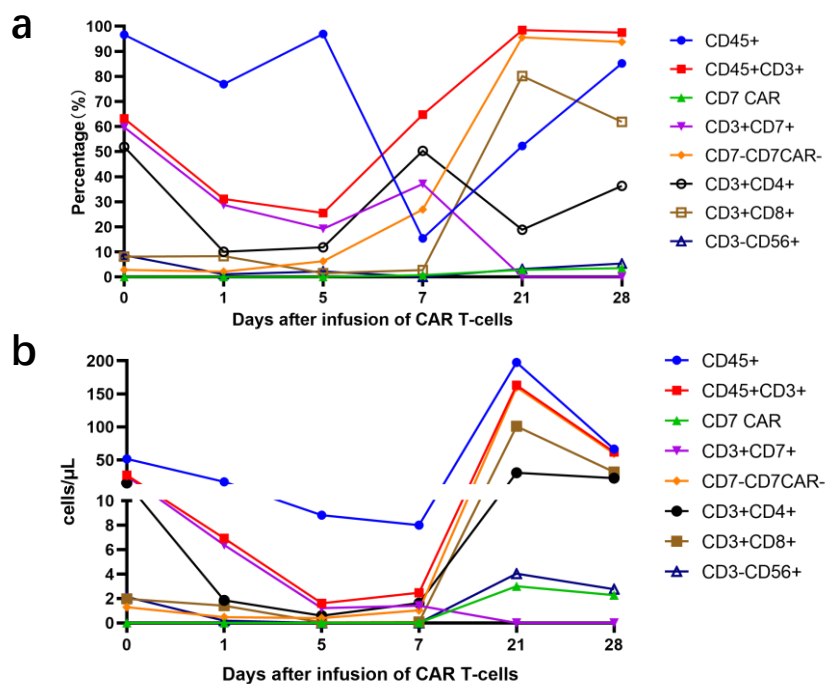

**Figure S4.** Flowcytometry analysis of the fraction of T-cells and NK cells in PB. **a.** The relative CAR T-cell copies, the fraction of T-cells and NK cells in PB after infusion; **b.** The absolute CAR T-cell copies, the fraction of T-cells and NK cells in PB after infusion.

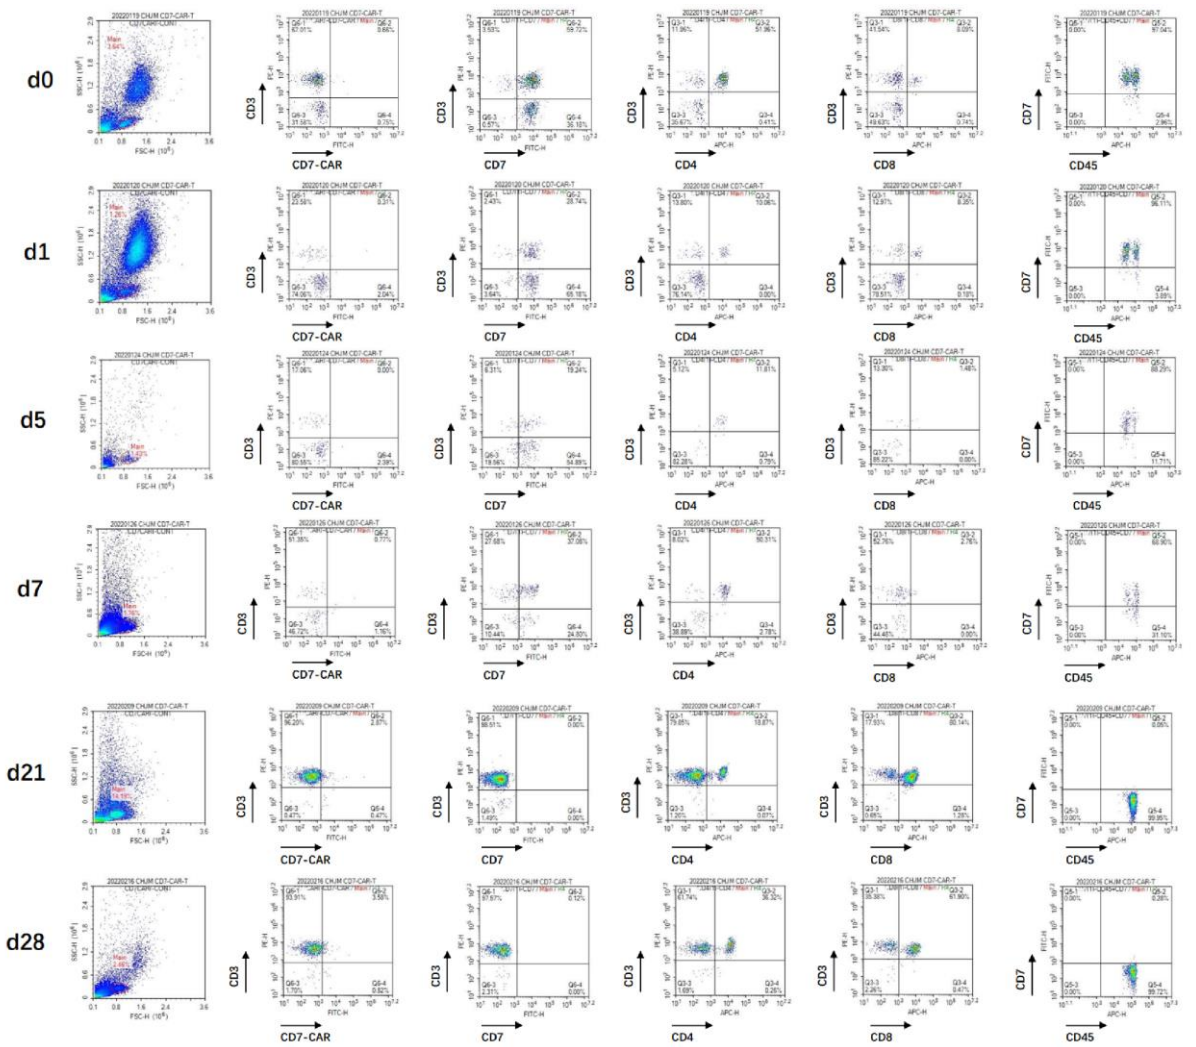

**Figure S5.** T-cell fractions in the PB after infusion with flow cytometry. The result of day 21 showed that the CD7 expression of T-cells had turned negative.

| Chromosome | Common disease-related genes | The location of the variant band on the chromosome (GRCh37/hg19) | type of mutation | mutation frequency (Mb) | Affected gene (quantity)              |
|------------|------------------------------|------------------------------------------------------------------|------------------|-------------------------|---------------------------------------|
| 1          | CFHR1 CFHR2<br>CFHR3 ABL2    |                                                                  |                  |                         |                                       |
| 2          |                              |                                                                  |                  |                         |                                       |
| 3          | CPNE4 EVI1 STAG1             |                                                                  |                  |                         |                                       |
| 4          |                              |                                                                  |                  |                         |                                       |
| 5          |                              |                                                                  |                  |                         |                                       |
| 6          | ZBTB2                        |                                                                  |                  |                         |                                       |
| 7          |                              |                                                                  |                  |                         |                                       |
| 8          | RUNX1T1                      |                                                                  |                  |                         |                                       |
| 9          | NOTCH1 CDKN2A<br>MLLT3       |                                                                  |                  |                         |                                       |
| 10         | CTNNA3 MLLT10                | 10q11.22(46293591_48220168)x3                                    | Gain             | 1.9                     | 29genes                               |
| 11         | WT1 MLL                      |                                                                  |                  |                         |                                       |
| 12         | AEBP2                        | 12q24.31(121771435_124536319)x1                                  | Loss             | 2.8                     | 66genes                               |
| 13         | FLT3                         |                                                                  |                  |                         |                                       |
| 14         |                              | 14q32.33(106251070_107152784)x3                                  | Gain             | 0.9                     | 8genes                                |
| 15         | PML                          |                                                                  |                  |                         |                                       |
| 16         |                              |                                                                  |                  |                         |                                       |
| 17         | P53                          | 17q11.2(29025997_30341286)x1<br>17p13.3p13.1(2233823_8236821)x1  | Loss             | 1.3<br>6.0              | 23genes<br>214genes<br>including TP53 |
| 18         |                              |                                                                  |                  |                         |                                       |
| 19         | CEBPA                        |                                                                  |                  |                         |                                       |
| 20         | ASXL1                        |                                                                  |                  |                         |                                       |
| 21         | RUNX1                        |                                                                  |                  |                         |                                       |
| 22         |                              |                                                                  |                  |                         |                                       |
| X          | PHF6 GATA1                   |                                                                  |                  |                         |                                       |
| Y          |                              |                                                                  |                  |                         |                                       |

**Table S1.** The result of SNP array (Cytoscan 750K/HD) before CAR T-cells infusion. Although the result showed normal diploid karyotype, the chromosome had 4 abnormalities (>1Mb), especially TP53 deletion, which can be considered as a complex molecular karyotype.

|         |        |        |        |        |        |          |        |        |          |        |
|---------|--------|--------|--------|--------|--------|----------|--------|--------|----------|--------|
| ABL1    | BRAF   | CD79B  | CXCR4  | EZH2   | IKZF3  | MED12    | PDGFRA | RELN   | STAG2    | TP63   |
| ANKRD26 | BRCA1  | CDKN1A | DDX3X  | FAM46C | IL7R   | MEF2B    | PDGFRB | RHOA   | STAT1    | TP73   |
| APC     | BRCA2  | CDKN2A | DDX41  | FAT1   | IRF4   | MPL      | PHF6   | RPS15  | STAT2    | TRAF3  |
| ARID1A  | BRCC3  | CDKN2B | DHX15  | FBXW7  | JAK1   | MUM1     | PIGA   | RUNX1  | STAT3    | TYK2   |
| ARID1B  | BTG1   | CDKN2C | DIS3   | FLT3   | JAK2   | MYC      | PIK3CA | SAMHD1 | STAT4    | U2AF1  |
| ARID2   | BTK    | CEBPA  | DNM2   | FOXO1  | JAK3   | MYD88    | PIM1   | SETBP1 | STAT5A   | UNC13D |
| ARID5B  | CALR   | CEBPE  | DNMT3A | GATA1  | KDM6A  | NF1      | PLCG1  | SETD2  | STAT5B   | WT1    |
| ASXL1   | CARD11 | CHD8   | ECT2L  | GATA2  | KIT    | NFKB1    | PLCG2  | SF3B1  | STAT6    | XPO1   |
| ASXL2   | CBL    | CIITA  | EED    | GATA3  | KLF2   | NFKB2    | PPM1D  | SH2B3  | SUZ12    | ZAP70  |
| ATM     | CCND1  | CRBN   | EGFR   | GNA13  | KMT2A  | NFKBIE   | PRDM1  | SMC1A  | TBL1XR1  | ZBTB7A |
| B2M     | CCND2  | CREBBP | EGR2   | HRAS   | KMT2C  | NOTCH1   | PTEN   | SMC2   | TCF3     | ZMYM3  |
| BCL2    | CCND3  | CRLF2  | EP300  | ID3    | KMT2D  | NOTCH2   | PTPN11 | SMC3   | TET1     | ZRSR2  |
| BCL6    | CD274  | CSF1R  | EPOR   | IDH1   | KRAS   | NPM1     | PTPRD  | SOS1   | TET2     |        |
| BCOR    | CD28   | CSF3R  | ERBB3  | IDH2   | MAP2K1 | NRAS     | RAD21  | SPEN   | TNFAIP3  |        |
| BCORL1  | CD58   | CSMD1  | ETNK1  | IGLL5  | MAPK1  | PAX5     | RAF1   | SRP72  | TNFRSF14 |        |
| BIRC3   | CD79A  | CTCF   | ETV6   | IKZF1  | MECOM  | PDCD1LG2 | RB1    | SRSF2  | TP53     |        |

**Table S2.** a panel (222 genes) of next generation sequencing.

|                                      |                                                                                                                             |
|--------------------------------------|-----------------------------------------------------------------------------------------------------------------------------|
| myeloid neoplasms with eosinophilia  | PDGFRA, PDGFRB, FGFR1, JAK2, ABL1, FLT3                                                                                     |
| acute myeloid leukemia               | BCR, ABL1, PML, RARA, RARB, RARG, RUNX1, CBFβ, KMT2A, NUP98, NUP214, GATA2, MECOM, FLT3, MLLT10, NPM1, RBM15, CBFA2T3, ETV6 |
| acute lymphoblastic leukemia         | BCR, ABL1, ETV6, RUNX1, MEF2D, ZNF384, IL3, TCF3, PBX1, ERG, DUX4, LYN, IKZF1, PAX5, TAL1, MYC                              |
| Ph like acute lymphoblastic leukemia | ABL1, ABL2, PDGFRA, PDGFRB, FGFR1, P2RY8, CRLF2, EPOR, JAK1, JAK2, JAK3, TYK2, FLT3, CSF1R, PTK2B, NTRK3                    |

**Table S3.** a panel of targeted transcriptome RNA sequencing(RNA-seq).
